# Supplementary material
Source: Springer Nature journal article supplement (https://www.springermedizin.de/resource/supplementary/12913_2006_384_MOESM1_ESM.pdf/9535072)
Supplement: MOESM1 [file 9535072]

Private Insurance company

P  
R  
E  
M  
I  
U  
M  
\$0.54

C  
L  
A  
I  
M  
S

R\*  
E  
I  
M  
B  
U  
R  
S  
E

ACCORD – the NGO  
organiser of the CHI

ASHWINI Health  
Programme

P  
R  
E  
M  
I  
U  
M  
\$0.54

C  
A  
R  
E

Members of the adivasi union
